# Supplementary material for: Effect of Agricultural Organic Inputs on Nanoplastics Transport in Saturated Goethite-Coated Porous Media: Particle Size Selectivity and Role of Dissolved Organic Matter
Source: PubMed Central journal article supplement (PMC8928475; doi:10.1021/acs.est.1c07574), 2022-02-28
Supplement: es1c07574_si_001.pdf [file es1c07574_si_001.pdf]

# Supplementary Material

## **Effect of agricultural organic inputs on nanoplastics transport in saturated goethite-coated porous media: Particle size selectivity and role of dissolved organic matter**

Jie Ma <sup>a,b</sup>, Yan Qiu <sup>c</sup>, Junying Zhao <sup>c</sup>, Xiaoxue Ouyang <sup>a,b</sup>, Yujie Zhao <sup>a,b</sup>, Liping Weng <sup>a,b,d\*</sup>, MD Yasir Arafat <sup>a,b</sup>, Yali Chen <sup>a,b</sup>, Zongling Ren <sup>e</sup>, Yongtao Li <sup>f,e</sup>

<sup>a</sup> Key Laboratory for Environmental Factors Control of Agro-Product Quality Safety, Ministry of Agriculture and Rural Affairs, Tianjin, 300191, China

<sup>b</sup> Agro-Environmental Protection Institute, Ministry of Agriculture and Rural Affairs, Tianjin 300191, China

<sup>c</sup> School of Environmental Science and Safety Engineering, Tianjin University of Technology, Tianjin, 300384, China

<sup>d</sup> Department of Soil Quality, Wageningen University, Wageningen, The Netherlands

<sup>e</sup> College of Resource and Environmental Engineering, Jiangxi University of Science and Technology, Ganzhou Jiangxi, 341000, China

<sup>f</sup> College of Natural Resources and Environment, South China Agricultural University, Guangzhou, 510642, China

\*Corresponding Author

Email address: majie@caas.cn (Jie Ma), wengliping@caas.cn (Liping Weng).

## **List of contents**

- S1. Goethite preparation
- S2. The calibration curves of molecular weights of DOM and humification index calculation
- S3. The calibration curves of concentrations of nanoplastics and nanoplastics with DOM
- S4. Zeta potential of experimental material
- S5. Nanoparticles transport models
- S6. XDLVO theory
- S7. Typical DOM selection reason and their molecular formula
- S8. Calculation of binding energy
- S9. Fitted parameters of nanoplastics transport in the GT coated sand columns
- S10. DLVO interaction energy between nanoplastics and (GT coated) sand
- S11. The contents of starch, hemicellulose, cellulose, and lignin in the agricultural organic inputs
- S12. FTIR differential spectra analysis
- S13. Transport of different DOM
- S14. Fitted parameters of DOM transport in the GT coated sand columns
- S15. Fitted parameters of nanoplastics co-transport with DOM in the GT coated sand columns
- S16. Stability of DOM and its influence on the stability of nanoplastics
- S17. DLVO interaction energy between nanoplastics and sand before and after co-

transport with DOM in the GT coated sand columns

S19. Deposition of nanoplastics

S20. XPS results of nanoplastics and different DOM co-deposited on GT coated sand

S21. Result parameters of quantum chemical computation

## S1. Goethite preparation

Goethite was prepared with adding 2.5 M NaOH at a speed of 10 ml min<sup>-1</sup> to 5 L 0.5 M Fe(NO<sub>3</sub>)<sub>3</sub> solution. Keep on mixing the suspension during the addition. And put a pH-electrode in the above suspension to monitor the pH and stop adding NaOH when pH = 12. Then put the suspension in an oven at 60 °C for 4 days to let Fe(OH)<sub>3</sub> age. At last, decant the clear solution on the top and dialyze Fe(OH)<sub>3</sub> paste until the EC < 10 μS.

## S2. The calibration curves of molecular weights of DOM and humification index calculation

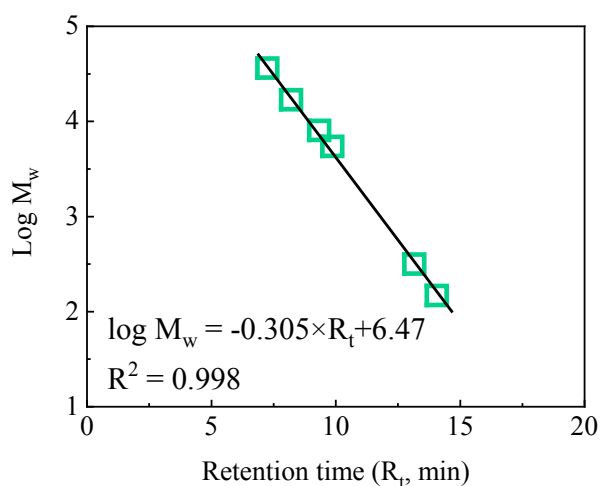

Figure S1. The calibration curves of molecular weights of DOM between retention time and standard substances.

According to the soluble organic components detected in the fluorescence spectral distribution, excitation/emission ( $E_x/E_m$ ) wavelength regions can be considered as humic acid-like areas to demonstrate the humic characteristics of these components <sup>1</sup>. The humification index (HIX) was calculated as the ratio of the peak integrated area of emission wavelengths ranging from 300 to 345 nm to that of emission wavelengths ranging from 435 to 480 nm, under a 255-nm excitation wavelength <sup>2</sup>.

### S3. The calibration curves of concentrations of nanoplastics and nanoplastics with DOM

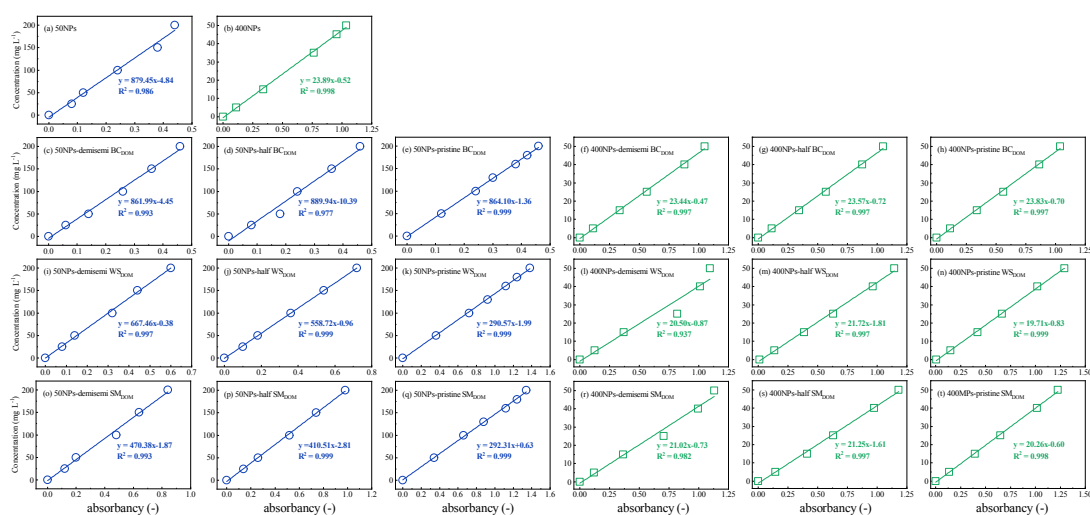

Figure S2. The calibration curves of 50NPs (a), 400NPs (b), and NPs-DOM suspension (c-t) concentrations between absorbency and standards at pH 6.0.

#### S4. Zeta potential of experimental material

Table S1 Zeta potential of NPs and NPs-DOM

| DOM                        | Zeta potential (mV) |                 |
|----------------------------|---------------------|-----------------|
|                            | 50NPs               | 400NPs          |
| -                          | $-39.8 \pm 1.2$     | $-40.6 \pm 0.7$ |
| pristine BC <sub>DOM</sub> | $-57.2 \pm 2.1$     | $-58.1 \pm 1.9$ |
| pristine WS <sub>DOM</sub> | $-30.4 \pm 1.5$     | $-28.9 \pm 1.3$ |
| pristine SM <sub>DOM</sub> | $-35.0 \pm 0.8$     | $-33.2 \pm 1.1$ |
| half BC <sub>DOM</sub>     | $-54.0 \pm 0.6$     | $-55.3 \pm 0.5$ |
| half WS <sub>DOM</sub>     | $-32.4 \pm 1.8$     | $-31.7 \pm 1.1$ |
| half SM <sub>DOM</sub>     | $-35.9 \pm 1.4$     | $-34.6 \pm 0.5$ |
| quarter BC <sub>DOM</sub>  | $-53.6 \pm 0.9$     | $-54.0 \pm 0.2$ |
| quarter WS <sub>DOM</sub>  | $-34.3 \pm 1.7$     | $-33.2 \pm 0.6$ |
| quarter SM <sub>DOM</sub>  | $-36.6 \pm 0.7$     | $-36.1 \pm 1.0$ |

Table S2 Zeta potential of quartz and GT coated quartz.

| Collector              | Quartz          | 0.2% GT-Quartz | 0.5% GT-Quartz | 2% GT-Quartz   |
|------------------------|-----------------|----------------|----------------|----------------|
| Zeta potential<br>(mV) | $-29.2 \pm 1.6$ | $19.8 \pm 0.6$ | $26.1 \pm 0.9$ | $30.2 \pm 1.1$ |

Table S3 Zeta potential of GT-coated sand (0-2.5, 2.5-5, 5-7.5, and 7.5-10 cm) after co-transport experiment of NPs and DOM.

| Column                                                | Zeta potential (mV) |                 |                 |                 |
|-------------------------------------------------------|---------------------|-----------------|-----------------|-----------------|
|                                                       | 0-2.5 cm            | 2.5-5 cm        | 5-7.5 cm        | 7.5-10 cm       |
| 2% GT-70 $\mu$ m Quartz pristine BC <sub>DOM</sub>    | -16.8 $\pm$ 5.1     | -12.4 $\pm$ 1.1 | -3.9 $\pm$ 2.1  | 8.7 $\pm$ 3.1   |
| 2% GT-70 $\mu$ m Quartz pristine WS <sub>DOM</sub>    | -10.7 $\pm$ 1.4     | 5.0 $\pm$ 2.0   | 16.9 $\pm$ 2.2  | 24.6 $\pm$ 1.6  |
| 2% GT-70 $\mu$ m Quartz pristine SM <sub>DOM</sub>    | -27.5 $\pm$ 1.8     | -21.2 $\pm$ 0.6 | -17.6 $\pm$ 2.0 | -15.5 $\pm$ 0.5 |
| 2% GT-338 $\mu$ m Quartz pristine BC <sub>DOM</sub>   | -15.7 $\pm$ 2.6     | -11.1 $\pm$ 0.8 | -6.6 $\pm$ 1.0  | -3.4 $\pm$ 1.3  |
| 2% GT-338 $\mu$ m Quartz pristine WS <sub>DOM</sub>   | -6.4 $\pm$ 2.8      | 9.2 $\pm$ 2.1   | 20.5 $\pm$ 0.5  | 25.3 $\pm$ 0.1  |
| 2% GT-338 $\mu$ m Quartz pristine SM <sub>DOM</sub>   | -24.4 $\pm$ 1.3     | -22.2 $\pm$ 1.6 | -19.5 $\pm$ 1.8 | -18.7 $\pm$ 1.0 |
| 0.2% GT-70 $\mu$ m Quartz pristine BC <sub>DOM</sub>  | -28.7 $\pm$ 0.6     | -28.2 $\pm$ 0.2 | -27.3 $\pm$ 1.0 | -22.3 $\pm$ 1.4 |
| 0.2% GT-70 $\mu$ m Quartz pristine WS <sub>DOM</sub>  | -26.4 $\pm$ 0.9     | -23.6 $\pm$ 0.5 | -16.0 $\pm$ 1.7 | -14.3 $\pm$ 2.2 |
| 0.2% GT-70 $\mu$ m Quartz pristine SM <sub>DOM</sub>  | -29.2 $\pm$ 0.1     | -29.0 $\pm$ 0.5 | -28.4 $\pm$ 0.4 | -27.7 $\pm$ 0.8 |
| 0.2% GT-338 $\mu$ m Quartz pristine BC <sub>DOM</sub> | -29.8 $\pm$ 0.1     | -27.2 $\pm$ 0.3 | -26.2 $\pm$ 0.2 | -24.3 $\pm$ 0.6 |
| 0.2% GT-338 $\mu$ m Quartz pristine WS <sub>DOM</sub> | -25.4 $\pm$ 0.4     | -22.0 $\pm$ 0.7 | -20.3 $\pm$ 0.9 | -15.6 $\pm$ 1.2 |
| 0.2% GT-338 $\mu$ m Quartz pristine SM <sub>DOM</sub> | -29.0 $\pm$ 0.5     | -27.0 $\pm$ 0.1 | -26.4 $\pm$ 1.3 | -25.8 $\pm$ 0.7 |
| 2% GT-70 $\mu$ m Quartz half BC <sub>DOM</sub>        | 16.2 $\pm$ 5.1      | 21.5 $\pm$ 2.4  | 23.9 $\pm$ 0.9  | 28.7 $\pm$ 2.2  |
| 2% GT-70 $\mu$ m Quartz half WS <sub>DOM</sub>        | 22.6 $\pm$ 0.8      | 25 $\pm$ 1.4    | 26.3 $\pm$ 3.4  | 28.6 $\pm$ 2.5  |
| 2% GT-70 $\mu$ m Quartz half SM <sub>DOM</sub>        | -17.4 $\pm$ 1.7     | -9.2 $\pm$ 4.3  | -7.6 $\pm$ 2.7  | -5.5 $\pm$ 1.2  |
| 2% GT-338 $\mu$ m Quartz half BC <sub>DOM</sub>       | -6.8 $\pm$ 3.1      | 5.4 $\pm$ 1.3   | 17.5 $\pm$ 1.9  | 23.4 $\pm$ 2.0  |
| 2% GT-338 $\mu$ m Quartz half WS <sub>DOM</sub>       | 15.3 $\pm$ 3.6      | 19.7 $\pm$ 2.2  | 24.0 $\pm$ 1.4  | 27.1 $\pm$ 1.8  |
| 2% GT-338 $\mu$ m Quartz half SM <sub>DOM</sub>       | -20.2 $\pm$ 0.2     | -19.1 $\pm$ 0.6 | -18.3 $\pm$ 1.3 | -17.9 $\pm$ 1.1 |
| 0.2% GT-70 $\mu$ m Quartz half BC <sub>DOM</sub>      | -18.4 $\pm$ 1.8     | -14.7 $\pm$ 0.4 | -11.6 $\pm$ 1.3 | -7.1 $\pm$ 2.1  |
| 0.2% GT-70 $\mu$ m Quartz half WS <sub>DOM</sub>      | -14.5 $\pm$ 6.2     | -7.7 $\pm$ 2.3  | -5.0 $\pm$ 3.4  | 4.0 $\pm$ 3.4   |
| 0.2% GT-70 $\mu$ m Quartz half SM <sub>DOM</sub>      | -24.4 $\pm$ 2.0     | -23.7 $\pm$ 1.4 | -22.3 $\pm$ 1.0 | -21.0 $\pm$ 1.8 |
| 0.2% GT-338 $\mu$ m Quartz half BC <sub>DOM</sub>     | -20.5 $\pm$ 0.5     | -19.8 $\pm$ 1.1 | -19.2 $\pm$ 0.7 | -17.3 $\pm$ 0.4 |
| 0.2% GT-338 $\mu$ m Quartz half WS <sub>DOM</sub>     | -21.4 $\pm$ 1.2     | -14.6 $\pm$ 2.6 | -9.6 $\pm$ 1.7  | -5.3 $\pm$ 2.9  |
| 0.2% GT-338 $\mu$ m Quartz half SM <sub>DOM</sub>     | -24.7 $\pm$ 1.5     | -23.3 $\pm$ 0.2 | -21.8 $\pm$ 1.8 | -20.8 $\pm$ 1.5 |
| 2% GT-70 $\mu$ m Quartz quarter BC <sub>DOM</sub>     | -4.2 $\pm$ 2.6      | 16.1 $\pm$ 2.4  | 27.5 $\pm$ 0.5  | 29.4 $\pm$ 1.9  |
| 2% GT-70 $\mu$ m Quartz quarter WS <sub>DOM</sub>     | 25.6 $\pm$ 0.4      | 28.7 $\pm$ 0.5  | 30.2 $\pm$ 1.1  | 30.3 $\pm$ 0.2  |
| 2% GT-70 $\mu$ m Quartz quarter SM <sub>DOM</sub>     | -16.6 $\pm$ 1.8     | 1.2 $\pm$ 5.1   | 22.6 $\pm$ 3.2  | 29.8 $\pm$ 1.3  |
| 2% GT-338 $\mu$ m Quartz quarter BC <sub>DOM</sub>    | 2.7 $\pm$ 4.2       | 9.8 $\pm$ 4.0   | 28.5 $\pm$ 1.3  | 29.6 $\pm$ 0.6  |
| 2% GT-338 $\mu$ m Quartz quarter WS <sub>DOM</sub>    | 21.5 $\pm$ 2.1      | 27.4 $\pm$ 2.0  | 28.8 $\pm$ 1.6  | 30.2 $\pm$ 0.3  |
| 2% GT-338 $\mu$ m Quartz quarter SM <sub>DOM</sub>    | -13.9 $\pm$ 4.2     | -7.1 $\pm$ 3.3  | -2.3 $\pm$ 3.8  | 8.5 $\pm$ 3.0   |
| 0.2% GT-70 $\mu$ m Quartz quarter BC <sub>DOM</sub>   | -11.4 $\pm$ 1.8     | -5.1 $\pm$ 2.4  | 4.6 $\pm$ 3.3   | 14.1 $\pm$ 2.1  |
| 0.2% GT-70 $\mu$ m Quartz quarter WS <sub>DOM</sub>   | -11.5 $\pm$ 6.2     | -3.7 $\pm$ 2.3  | 7.0 $\pm$ 4.4   | 15.5 $\pm$ 2.1  |
| 0.2% GT-70 $\mu$ m Quartz quarter SM <sub>DOM</sub>   | -21.2 $\pm$ 1.9     | -14.1 $\pm$ 2.2 | -5.7 $\pm$ 3.8  | 7.0 $\pm$ 2.4   |
| 0.2% GT-338 $\mu$ m Quartz quarter BC <sub>DOM</sub>  | -12.3 $\pm$ 0.8     | -6.8 $\pm$ 1.4  | 3.1 $\pm$ 1.7   | 12.5 $\pm$ 2.1  |
| 0.2% GT-338 $\mu$ m Quartz quarter WS <sub>DOM</sub>  | -11.7 $\pm$ 2.6     | -4.0 $\pm$ 3.5  | 9.2 $\pm$ 3.2   | 16.7 $\pm$ 2.2  |
| 0.2% GT-338 $\mu$ m Quartz quarter SM <sub>DOM</sub>  | -20.2 $\pm$ 1.9     | -13.5 $\pm$ 2.7 | -7.4 $\pm$ 1.7  | 5.9 $\pm$ 3.3   |

## S5. Nanoparticles transport models

The convection diffusion equation (CDE) with two kinetic retention sites was employed to describe the nanoparticle transport and retention in the column experiments as equation (1) <sup>3,4</sup>.

$$\frac{\partial C}{\partial t} = -\frac{v\partial C}{\theta\partial x} + D\frac{\partial^2 C}{\partial x^2} - \frac{\rho\partial S_1}{\theta\partial t} - \frac{\rho\partial S_2}{\theta\partial t} \quad (1)$$

$\theta$  ( $\text{cm}^3 \cdot \text{cm}^{-3}$ ) is the volumetric water content;  $D$  is the dispersion coefficient ( $\text{m}^2 \cdot \text{s}^{-1}$ );  $\rho$  ( $\text{g} \cdot \text{m}^{-3}$ ) is the column dry bulk density;  $x$  (cm) is the spatial coordinate;  $v$  ( $\text{cm} \cdot \text{min}^{-1}$ ) is the Darcy's velocity; and  $S_1$  ( $\text{g} \cdot \text{g}^{-1}$ ) and  $S_2$  ( $\text{g} \cdot \text{g}^{-1}$ ) are nanoparticle concentrations deposited in Site1 and Site2, respectively.

The Site1, first kinetic site, on which the retention of the nanoparticle is assumed to be reversible, whereas Site2, the second kinetic site, on which the retention is assumed to be irreversible, as described by the depth-dependent retention.  $S_1$  on Site1 and  $S_2$  on Site2 are given in equations (2) and (3), respectively.

$$\frac{\rho\partial S_1}{\theta\partial t} = k_{1a}C - \frac{\rho}{\theta}k_{1d}S_1 \quad (2)$$

$$\frac{\rho\partial S_2}{\theta\partial t} = \psi_t k_{2a}C \quad (3)$$

$k_{1a}$  ( $\text{min}^{-1}$ ) and  $k_{2a}$  ( $\text{min}^{-1}$ ) are first-order retention coefficients on Site1 and Site2, respectively;  $k_{1d}$  ( $\text{min}^{-1}$ ) is the first-order detachment coefficient;  $\psi_t$  (dimensionless) is the nanoparticle attachment function to account for the depth-dependent behavior of particle attachment expressed by equations (4):

$$\psi_t = \left( \frac{d_c + x - x_0}{d_c} \right)^{-\beta} \quad (4)$$

$d_c$  is the median diameter of the sand grains (cm);  $x_0$  is the coordinate of the location where the straining process starts; and  $\beta$  (dimensionless) is an empirical



variable that controls the shape of the retention profile, using an optimal value of 0.432 for different sized spherical nanoparticle and sand grains in which significant depth-dependency (hyperexponential retention profiles) occurred <sup>4</sup>. Three parameters, including  $k_{1a}$ ,  $k_{2a}$ , and  $k_{1d}$ , were fitted.

## S6. DLVO theory

The representative Derjaguin-Landau-Verwey-Overbeek (DLVO) theory was used to qualitatively understand the NPs transport and retention in water-saturated sands columns through calculating the total particle-sand interaction energy as the sum of Lifshitz-van der Waals (LW) and electrical double layer (EDL) interactions <sup>5,6</sup>. Ionic strength stays constant at 0.1 mM NaCl. The equation of the LW interaction energy ( $E_{LW}$ ) is given as follows <sup>7,8</sup>:

$$E_{LW} = -\frac{A_{132}d_p}{12h}\left[1 + \frac{14h}{\lambda}\right]^{-1} \quad (5)$$

$d_p$  is the diameter of nanoparticle;  $h$  is the separation distance between the nanoparticle and sand surface;  $\lambda$  is the characteristic wavelength of interaction and was defined as 100 nm;  $A_{132}$  is the Hamaker constant of particle-water-sand, which can be expressed by equation (6):

$$A_{132} = (\sqrt{A_{11}} - \sqrt{A_{33}})(\sqrt{A_{22}} - \sqrt{A_{33}}) \quad (6)$$

$A_{11}$  is the Hamaker constant for NPs ( $6.60 \times 10^{-20}$  J) <sup>9</sup>;  $A_{22}$  is the Hamaker constant for quartz sand ( $8.86 \times 10^{-20}$  J) <sup>10</sup>;  $A_{33}$  is the Hamaker constant for water ( $3.7 \times 10^{-20}$  J) <sup>9</sup>.

The equation of EDL interaction energy ( $E_{EDL}$ ) is given as follows <sup>11,12</sup>:

$$E_{EDL} = 0.5\pi\epsilon_0\epsilon_r d_p \left\{ 2\psi_p\psi_c \ln \left[ \frac{1 + \exp(-\kappa h)}{1 - \exp(-\kappa h)} \right] + (\psi_p^2 + \psi_c^2) \ln[1 - \exp(-2\kappa h)] \right\} \quad (7)$$

$\epsilon_0$  is the dielectric permittivity of vacuum ( $8.854 \times 10^{-12} \text{ F}\cdot\text{m}^{-1}$ );  $\epsilon_r$  is the relative dielectric permittivity of water (78.5);  $\psi_p$  and  $\psi_c$  are the zeta potentials of NPs and GT-coated sand, respectively;  $\kappa$  ( $\text{m}^{-1}$ ) is the Debye-Hückel parameter, which is expressed by equation (8);

$$\kappa = 3.28 \times 10^9 (I)^{1/2} \quad (8)$$

I is ionic strength.

## **S7. Typical DOM selection reason and their molecular formula**

A part of the polysaccharides in  $WS_{DOM}$  and  $SM_{DOM}$  may be directly or indirectly derived from the cellulose (CL) in plant cell walls; thus, CL was selected to represent polysaccharides. Amylose (AM) was also selected as a common polysaccharide. Both plant and animal lipids mostly comprise long chains with an ester carbonyl group; thus, oleic acid (OA) represented lipid-like compounds. Moreover, a tetrapeptide (TP, valine-glycine-serine-alanine) was chosen to represent proteins. Furthermore, HA and fulvic acid (FA) were considered as typical DOM. Two hundred original configurations were generated, and each configuration was then optimized based on Parameterized Model number 6. The first thirty configurations with the lowest energies were further optimized based on the all-electron density functional theory (DFT) at B3LYP/3-21G(d) level using Gaussian 16<sup>13</sup>. The optimized configuration with the lowest energy was then further optimized at B3LYP/6-31G(d) level. Finally, the single-point energy was calculated at the B3LYP/6-311G(d) level. Grimme's D3BJ dispersion was used to describe the inter-molecular interactions.

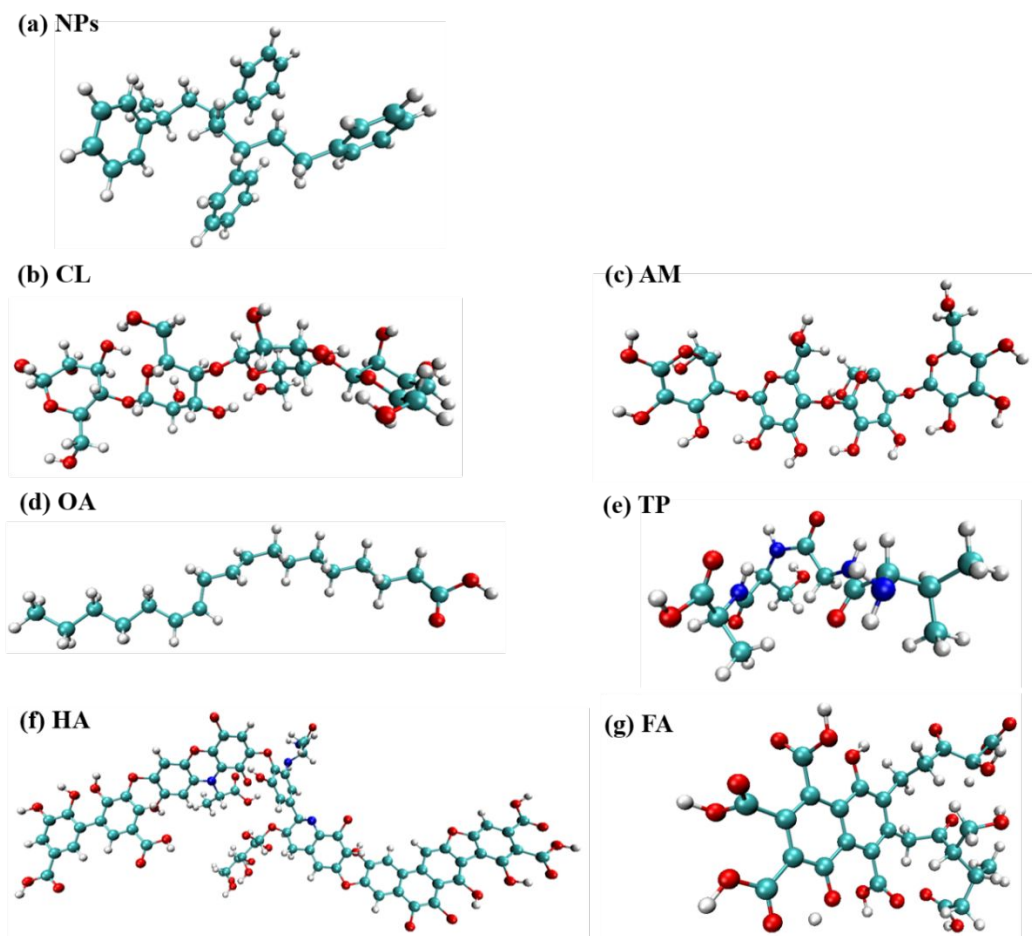

Figure S3. Molecular formula of typical DOM, molecular structure of HA and FA cited from [Ouni, et al. <sup>14</sup>](#). The blue-green, white, red, and blue spheres represent C, O, H, and N, respectively.

### S8. Calculation of binding energy

The equation of binding energy between different species NPs and DOM is given as follows:

$$\text{Binding energy} = E_{\text{complex}} - (E_{\text{fragment1}} + E_{\text{fragment2}}) \quad (9)$$

Where  $E_{\text{complex}}$  represents the energy of a complex composed of two molecules, and  $E_{\text{Fragment1}}$  and  $E_{\text{Fragment2}}$  represent the energy of a single molecule corresponding to different systems.

## S9. Fitted parameters of nanoplastics transport in the GT coated sand columns

Table S4. Fitted parameters of NPs transport in different ratio GT coated 70  $\mu\text{m}$  and 338  $\mu\text{m}$  sand columns at pH 6.0.

| NPs    | Column                           | $k_{1a}^a$ (min <sup>-1</sup> ) | $k_{1d}^b$ (min <sup>-1</sup> ) | $k_{2a}^c$ (min <sup>-1</sup> ) | $k_{1d}/k_{1a}$   | R <sup>2</sup> <sup>d</sup> | Recovery <sup>e</sup> (%) |
|--------|----------------------------------|---------------------------------|---------------------------------|---------------------------------|-------------------|-----------------------------|---------------------------|
| 50NPs  | 70 $\mu\text{m}$ Quartz          | 0.20 $\pm$ 0.13                 | 0.617 $\pm$ 0.396               | 0.032 $\pm$ 0.010               | 3.02 $\pm$ 0.03   | 0.995 $\pm$ 0.002           | 98.8 $\pm$ 0.9            |
|        | 0.2% GT-70 $\mu\text{m}$ Quartz  | 1.22 $\pm$ 0.35                 | 0.008 $\pm$ 0.002               | 0.000 $\pm$ 0.000               | 0.006 $\pm$ 0.000 | 0.988 $\pm$ 0.001           | 88.0 $\pm$ 1.3            |
|        | 0.5% GT-70 $\mu\text{m}$ Quartz  | 1.59 $\pm$ 0.13                 | 0.001 $\pm$ 0.000               | 0.013 $\pm$ 0.007               | 0.000 $\pm$ 0.000 | 0.998 $\pm$ 0.001           | 75.8 $\pm$ 2.5            |
|        | 2% GT-70 $\mu\text{m}$ Quartz    | 1.16 $\pm$ 0.02                 | 0.000 $\pm$ 0.000               | 0.000 $\pm$ 0.000               | 0.000 $\pm$ 0.000 | 0.996 $\pm$ 0.001           | 59.1 $\pm$ 2.3            |
|        | 338 $\mu\text{m}$ Quartz         | 0.03 $\pm$ 0.00                 | 0.324 $\pm$ 0.196               | 0.000 $\pm$ 0.000               | 13.17 $\pm$ 9.156 | 0.959 $\pm$ 0.007           | 106.6 $\pm$ 0.2           |
|        | 0.2% GT-338 $\mu\text{m}$ Quartz | 0.45 $\pm$ 0.19                 | 0.003 $\pm$ 0.001               | 0.000 $\pm$ 0.000               | 0.007 $\pm$ 0.000 | 0.996 $\pm$ 0.003           | 92.9 $\pm$ 2.2            |
|        | 0.5% GT-338 $\mu\text{m}$ Quartz | 0.34 $\pm$ 0.07                 | 0.024 $\pm$ 0.001               | 0.000 $\pm$ 0.000               | 0.074 $\pm$ 0.012 | 0.969 $\pm$ 0.002           | 94.5 $\pm$ 2.7            |
|        | 2% GT-338 $\mu\text{m}$ Quartz   | 0.38 $\pm$ 0.03                 | 0.003 $\pm$ 0.002               | 0.014 $\pm$ 0.004               | 0.008 $\pm$ 0.005 | 0.985 $\pm$ 0.006           | 86.9 $\pm$ 1.4            |
| 400NPs | 70 $\mu\text{m}$ Quartz          | 2.17 $\pm$ 2.07                 | 4.33 $\pm$ 4.11                 | 0.114 $\pm$ 0.005               | 2.07 $\pm$ 0.08   | 0.993 $\pm$ 0.006           | 91.9 $\pm$ 1.4            |
|        | 0.2% GT-70 $\mu\text{m}$ Quartz  | -                               | -                               | -                               | -                 | -                           | 0.1 $\pm$ 0.0             |
|        | 338 $\mu\text{m}$ Quartz         | 3.41 $\pm$ 0.20                 | 7.93 $\pm$ 0.46                 | 0.031 $\pm$ 0.003               | 2.32 $\pm$ 0.00   | 0.999 $\pm$ 0.000           | 94.9 $\pm$ 0.5            |
|        | 0.2% GT-338 $\mu\text{m}$ Quartz | 0.62 $\pm$ 0.18                 | 0.000 $\pm$ 0.000               | 1.112 $\pm$ 0.581               | 0.000 $\pm$ 0.000 | 0.963 $\pm$ 0.022           | 6.3 $\pm$ 1.2             |

<sup>a</sup> The first-order retention coefficient on Site1.

<sup>b</sup> The first-order detachment coefficient on Site1.

<sup>c</sup> The first-order retention coefficient on Site2.

<sup>d</sup> Squared Pearson's correlation coefficient.

<sup>e</sup> Recovery of NPs in the effluent.

### S10. DLVO interaction energy between nanoplastics and (GT-coated) sand

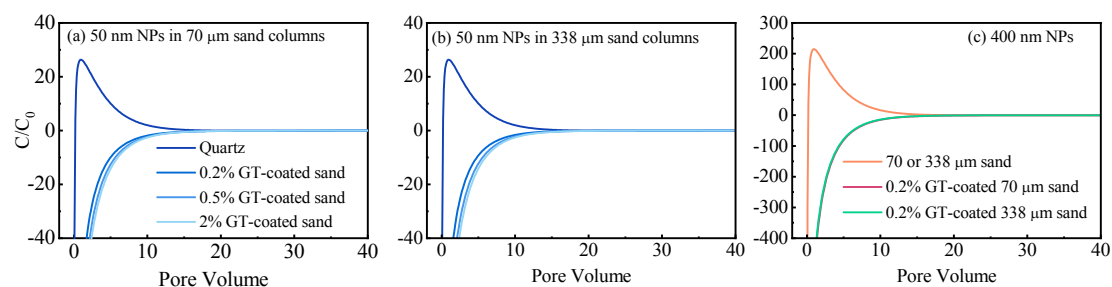

Figure S4. DLVO interaction energy ( $E_{TOT}$ ) between NPs and (GT-coated) sand. The  $E_{TOT}$  is expressed in  $kT$ , where  $k$  is the Boltzmann constant and  $T$  is the absolute temperature in Kelvin.

### S11. The contents of starch, hemicellulose, cellulose, and lignin in the agricultural organic inputs

The contents of starch, hemicellulose, cellulose, and lignin in BC, SW, and SM were determined using an enzymatic method [15, 16](#).

Table S5. The contents of starch, hemicellulose, cellulose, and lignin in the BC, SW, and SM

| Agricultural organic inputs | starch (%)    | hemicellulose (%) | cellulose (%) | lignin (%)  |
|-----------------------------|---------------|-------------------|---------------|-------------|
| BC                          | 0.000 ± 0.000 | 0.00 ± 0.00       | 0.75 ± 0.08   | 2.75 ± 0.08 |
| WS                          | 0.071 ± 0.014 | 28.14 ± 0.19      | 38.72 ± 0.14  | 7.17 ± 0.20 |
| SM                          | 0.057 ± 0.009 | 9.54 ± 0.44       | 10.05 ± 0.16  | 7.39 ± 0.36 |

## S12. FTIR characteristics of nanoplastics and FTIR differential spectra analysis

The series absorption peaks at 3085, 3062, and 3025  $\text{cm}^{-1}$  were attributed to the C-H stretching vibration of the benzene ring, and the series absorption peaks at 2924 and 2852  $\text{cm}^{-1}$  were assigned to the C-H stretching vibration of methylene. The stair-stepping peaks at 1604  $\text{cm}^{-1}$ , 1494  $\text{cm}^{-1}$ , and 1451  $\text{cm}^{-1}$  were related to the C=C stretching vibration of the benzene ring, and the absorption peaks at 756  $\text{cm}^{-1}$  and 700  $\text{cm}^{-1}$  were assigned to the C-H bending vibration of the benzene ring.

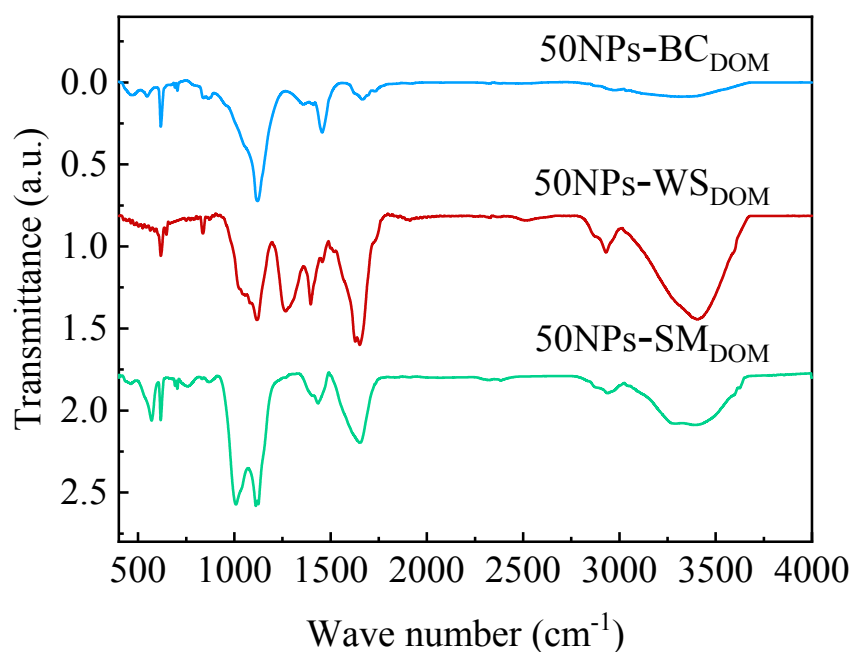

Figure S5. FTIR differential spectra analysis between different 50NPs-DOM and 50NPs

### S13. Transport of different DOM

For individual DOM transport, particularly in 2% GT-coated 70- $\mu\text{m}$  sand, the high content of GT and fine sand might cause DOM retention in the column (Fig. S6). Negatively charged DOM was readily adsorbed on GT during transport, forming a ligand exchange between the carboxyl/hydroxyl functional groups of DOM and the GT surface<sup>17</sup>. The retention of DOM significantly changed the properties of the GT-coated sand. The retention rate was the highest (average: 43.0%) in  $\text{BC}_{\text{DOM}}$  because of its low concentration (Table S6); however, the amount retained in the column was low. The retention rate of  $\text{WS}_{\text{DOM}}$  (average: 36.2%) was higher than that of  $\text{SM}_{\text{DOM}}$  (average: 20.9%) (Table S6).  $\text{WS}_{\text{DOM}}$  was readily deposited in the 2% GT-coated 70- $\mu\text{m}$  sand column (71%) (Fig. S6 and Table S6) because the protein-like substance in DOM promoted the formation of bridged complexes with GT and organic molecules<sup>18</sup>, and the small pore structure facilitated this process.



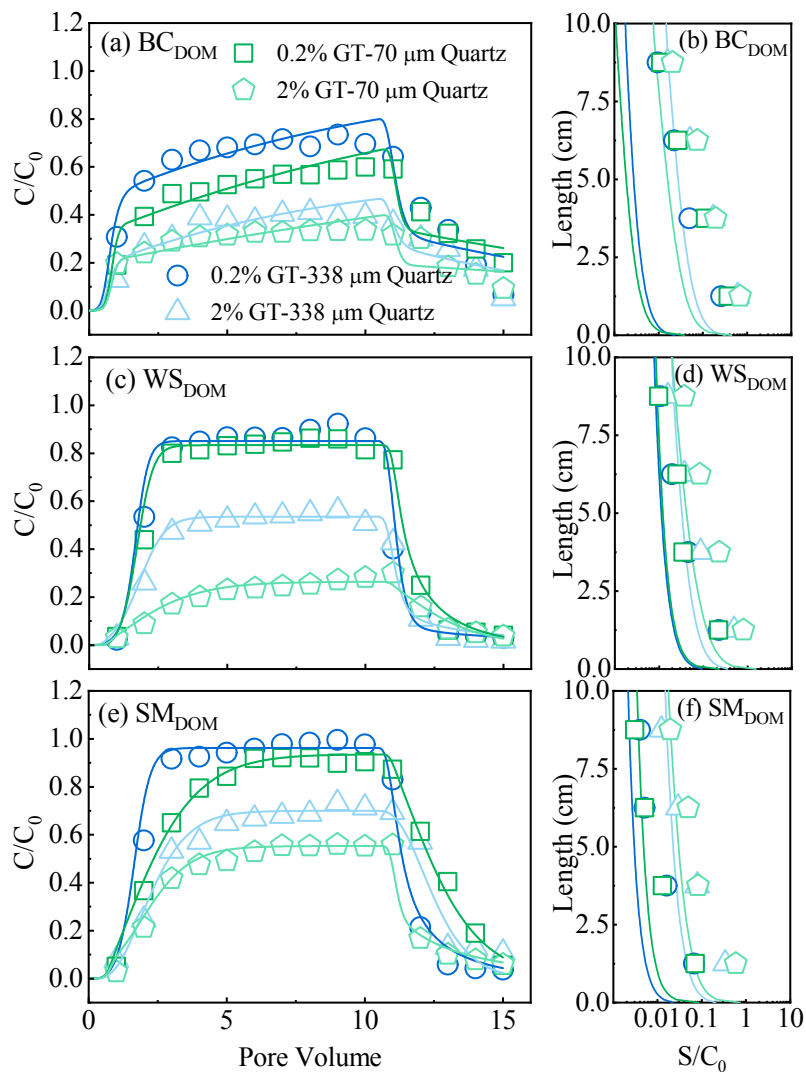

Figure S6. Breakthrough curves (a, c, and e) and RPs (b, d, and f) of  $BC_{DOM}$  (a and b),  $WS_{DOM}$  (c and d), and  $SM_{DOM}$  (e and f) at pH 7.0. The DOM RPs were plotted as the initial DOM concentration normalized (DOM retention in the sands columns  $S_r$  divided by initial DOM concentration) as DOM retention per gram of dry sand as a function of distance from the column inlet. Symbols and solid lines show the observed data and simulation fitting, respectively.

#### S14. Fitted parameters of DOM transport in the GT coated sand columns

Table S6. Fitted parameters of transport of DOM released from BC, WS, and SM in the 0.2% and 2% GT coated 70  $\mu\text{m}$  and 338  $\mu\text{m}$  sand columns at pH 6.0.

| DOM                      | Column                           | $k_{1a}$ ( $\text{min}^{-1}$ ) | $k_{1d}$ ( $\text{min}^{-1}$ ) | $k_{2a}$ ( $\text{min}^{-1}$ ) | $k_{1d}/k_{1a}$ | $R^2$ | Recovery (%) |        |        |
|--------------------------|----------------------------------|--------------------------------|--------------------------------|--------------------------------|-----------------|-------|--------------|--------|--------|
|                          |                                  |                                |                                |                                |                 |       | Effluent     | Column | Total  |
| $\text{BC}_{\text{DOM}}$ | 0.2% GT-70 $\mu\text{m}$ Quartz  | 0.125                          | 0.016                          | 0.005                          | 0.127           | 0.931 | 67.52        | 35.25  | 102.77 |
|                          | 2% GT-70 $\mu\text{m}$ Quartz    | 0.143                          | 0.012                          | 0.549                          | 0.082           | 0.825 | 40.50        | 61.98  | 102.48 |
|                          | 0.2% GT-338 $\mu\text{m}$ Quartz | 0.084                          | 0.022                          | 0.027                          | 0.262           | 0.951 | 80.22        | 21.32  | 101.54 |
|                          | 2% GT-338 $\mu\text{m}$ Quartz   | 0.129                          | 0.028                          | 0.399                          | 0.217           | 0.811 | 45.92        | 53.40  | 99.32  |
| $\text{WS}_{\text{DOM}}$ | 0.2% GT-70 $\mu\text{m}$ Quartz  | 0.537                          | 0.225                          | 0.273                          | 0.418           | 0.995 | 83.17        | 18.30  | 101.47 |
|                          | 2% GT-70 $\mu\text{m}$ Quartz    | 0.304                          | 0.186                          | 2.061                          | 0.612           | 0.954 | 26.25        | 70.14  | 96.39  |
|                          | 0.2% GT-338 $\mu\text{m}$ Quartz | 0.603                          | 0.019                          | 0.112                          | 0.032           | 0.975 | 81.6         | 16.79  | 98.39  |
|                          | 2% GT-338 $\mu\text{m}$ Quartz   | 0.373                          | 0.045                          | 0.446                          | 0.119           | 0.990 | 50.81        | 39.72  | 90.53  |
| $\text{SM}_{\text{DOM}}$ | 0.2% GT-70 $\mu\text{m}$ Quartz  | 0.300                          | 0.200                          | 0.100                          | 0.666           | 0.994 | 94.03        | 7.78   | 101.81 |
|                          | 2% GT-70 $\mu\text{m}$ Quartz    | 0.250                          | 0.061                          | 0.900                          | 0.244           | 0.979 | 53.32        | 44.16  | 97.48  |
|                          | 0.2% GT-338 $\mu\text{m}$ Quartz | 0.589                          | 0.206                          | 0.026                          | 0.350           | 0.994 | 94.81        | 6.96   | 101.77 |
|                          | 2% GT-338 $\mu\text{m}$ Quartz   | 0.785                          | 0.568                          | 0.251                          | 0.724           | 0.964 | 71.74        | 24.79  | 96.53  |

### S15. Fitted parameters of nanoplastics co-transport with DOM in the GT coated sand columns

Table S7. Fitted parameters of NPs co-transport with different concentrations DOM released from BC, WS, and SM in the 0.2% and 2% GT coated 70  $\mu\text{m}$  and 338  $\mu\text{m}$  sand columns at pH 6.0.

| NPs    | Column                           | DOM                              | $k_{1a}$ ( $\text{min}^{-1}$ ) | $k_{1d}$ ( $\text{min}^{-1}$ ) | $k_{2a}$ ( $\text{min}^{-1}$ ) | $k_{1d}/k_{1a}$   | $R^2$             | Recovery (%)   |
|--------|----------------------------------|----------------------------------|--------------------------------|--------------------------------|--------------------------------|-------------------|-------------------|----------------|
| 50NPs  | 2% GT-70 $\mu\text{m}$ Quartz    | quarter $\text{BC}_{\text{DOM}}$ | -                              | -                              | -                              | -                 | -                 | $0.0 \pm 0.0$  |
|        |                                  | quarter $\text{WS}_{\text{DOM}}$ | $0.67 \pm 0.24$                | $0.308 \pm 0.308$              | $1.957 \pm 1.956$              | $0.342 \pm 0.340$ | $0.823 \pm 0.118$ | $8.3 \pm 0.1$  |
|        |                                  | quarter $\text{SM}_{\text{DOM}}$ | -                              | -                              | -                              | -                 | -                 | $4.0 \pm 0.2$  |
|        | 2% GT-338 $\mu\text{m}$ Quartz   | quarter $\text{BC}_{\text{DOM}}$ | $0.25 \pm 0.04$                | $0.001 \pm 0.001$              | $0.025 \pm 0.023$              | $0.005 \pm 0.004$ | $0.989 \pm 0.008$ | $71.5 \pm 2.7$ |
|        |                                  | quarter $\text{WS}_{\text{DOM}}$ | $0.18 \pm 0.01$                | $0.004 \pm 0.002$              | $0.086 \pm 0.006$              | $0.023 \pm 0.011$ | $0.982 \pm 0.01$  | $74.6 \pm 0.5$ |
|        |                                  | quarter $\text{SM}_{\text{DOM}}$ | $0.24 \pm 0.01$                | $0.002 \pm 0.001$              | $0.169 \pm 0.018$              | $0.009 \pm 0.004$ | $0.983 \pm 0.008$ | $54.5 \pm 1.3$ |
| 400NPs | 0.2% GT-70 $\mu\text{m}$ Quartz  | quarter $\text{BC}_{\text{DOM}}$ | -                              | -                              | -                              | -                 | -                 | $0.0 \pm 0.0$  |
|        |                                  | quarter $\text{WS}_{\text{DOM}}$ | -                              | -                              | -                              | -                 | -                 | $0.8 \pm 0.1$  |
|        |                                  | quarter $\text{SM}_{\text{DOM}}$ | -                              | -                              | -                              | -                 | -                 | $4.0 \pm 0.4$  |
|        | 0.2% GT-338 $\mu\text{m}$ Quartz | quarter $\text{BC}_{\text{DOM}}$ | $0.35 \pm 0.02$                | $0.002 \pm 0.001$              | $1.228 \pm 0.120$              | $0.005 \pm 0.004$ | $0.930 \pm 0.016$ | $10.3 \pm 0.5$ |
|        |                                  | quarter $\text{WS}_{\text{DOM}}$ | $0.29 \pm 0.02$                | $0.007 \pm 0.003$              | $1.198 \pm 0.065$              | $0.024 \pm 0.001$ | $0.946 \pm 0.001$ | $14.0 \pm 0.9$ |
|        |                                  | quarter $\text{SM}_{\text{DOM}}$ | $0.56 \pm 0.03$                | $0.000 \pm 0.000$              | $0.934 \pm 0.143$              | $0.000 \pm 0.000$ | $0.892 \pm 0.026$ | $14.6 \pm 2.4$ |
| 50NPs  | 2% GT-70 $\mu\text{m}$ Quartz    | half $\text{BC}_{\text{DOM}}$    | $1.04 \pm 0.72$                | $0.409 \pm 0.174$              | $2.900 \pm 0.034$              | $0.532 \pm 0.200$ | $0.932 \pm 0.002$ | $15.6 \pm 0.1$ |
|        |                                  | half $\text{WS}_{\text{DOM}}$    | $1.41 \pm 1.00$                | $0.980 \pm 0.980$              | $1.542 \pm 1.539$              | $0.406 \pm 0.406$ | $0.858 \pm 0.074$ | $12.5 \pm 1.4$ |
|        |                                  | half $\text{SM}_{\text{DOM}}$    | -                              | -                              | -                              | -                 | -                 | $3.4 \pm 2.4$  |

|        |                       |                            |               |               |               |               |               |            |
|--------|-----------------------|----------------------------|---------------|---------------|---------------|---------------|---------------|------------|
|        |                       | half BC <sub>DOM</sub>     | 0.37 ± 0.05   | 0.001 ± 0.000 | 0.073 ± 0.035 | 0.002 ± 0.000 | 0.991 ± 0.003 | 58.5 ± 2.6 |
|        | 2% GT-338 μm Quartz   | half WS <sub>DOM</sub>     | 0.22 ± 0.01   | 0.002 ± 0.000 | 0.144 ± 0.025 | 0.011 ± 0.000 | 0.987 ± 0.002 | 59.3 ± 0.2 |
|        |                       | half SM <sub>DOM</sub>     | 0.34 ± 0.00   | 0.002 ± 0.000 | 0.264 ± 0.061 | 0.006 ± 0.000 | 0.981 ± 0.003 | 41.4 ± 1.9 |
| 400NPs | 0.2% GT-70 μm Quartz  | half BC <sub>DOM</sub>     | 1.57 ± 0.64   | 0.010 ± 0.005 | 0.394 ± 0.394 | 0.006 ± 0.001 | 0.942 ± 0.020 | 24.3 ± 1.6 |
|        |                       | half WS <sub>DOM</sub>     | 0.45 ± 0.01   | 0.009 ± 0.009 | 2.733 ± 0.346 | 0.019 ± 0.019 | 0.907 ± 0.017 | 7.5 ± 1.2  |
|        |                       | half SM <sub>DOM</sub>     | 0.481 ± 0.027 | 0.027 ± 0.004 | 0.277 ± 0.001 | 0.057 ± 0.012 | 0.982 ± 0.002 | 72.5 ± 1.3 |
|        | 0.2% GT-338 μm Quartz | half BC <sub>DOM</sub>     | 0.32 ± 0.03   | 0.001 ± 0.000 | 0.000 ± 0.000 | 0.003 ± 0.000 | 0.974 ± 0.001 | 58.2 ± 3.9 |
|        |                       | half WS <sub>DOM</sub>     | 0.66 ± 0.13   | 0.004 ± 0.001 | 0.001 ± 0.001 | 0.007 ± 0.003 | 0.949 ± 0.002 | 31.9 ± 6.5 |
|        |                       | half SM <sub>DOM</sub>     | 0.48 ± 0.04   | 0.014 ± 0.007 | 0.021 ± 0.004 | 0.029 ± 0.013 | 0.980 ± 0.004 | 83.0 ± 0.2 |
| 50NPs  | 2% GT-70 μm Quartz    | pristine BC <sub>DOM</sub> | 0.480 ± 0.150 | 0.178 ± 0.143 | 2.910 ± 0.807 | 0.308 ± 0.203 | 0.682 ± 0.125 | 12.3 ± 2.2 |
|        |                       | pristine WS <sub>DOM</sub> | 0.208 ± 0.085 | 0.158 ± 0.056 | 2.655 ± 0.005 | 0.780 ± 0.049 | 0.955 ± 0.006 | 18.5 ± 0.1 |
|        |                       | pristine SM <sub>DOM</sub> | -             | -             | -             | -             | -             | 2.3 ± 0.1  |
|        | 2% GT-338 μm Quartz   | pristine BC <sub>DOM</sub> | 0.517 ± 0.050 | 0.000 ± 0.000 | 0.264 ± 0.019 | 0.000 ± 0.000 | 0.924 ± 0.023 | 47.0 ± 0.4 |
|        |                       | pristine WS <sub>DOM</sub> | 0.249 ± 0.001 | 0.000 ± 0.000 | 0.372 ± 0.008 | 0.000 ± 0.000 | 0.928 ± 0.003 | 46.7 ± 1.3 |
|        |                       | pristine SM <sub>DOM</sub> | 0.369 ± 0.001 | 0.006 ± 0.001 | 0.315 ± 0.184 | 0.015 ± 0.001 | 0.955 ± 0.015 | 38.4 ± 3.0 |
| 400NPs | 0.2% GT-70 μm Quartz  | pristine BC <sub>DOM</sub> | 1.362 ± 0.072 | 0.064 ± 0.020 | 0.186 ± 0.028 | 0.048 ± 0.017 | 0.969 ± 0.007 | 71.7 ± 3.9 |
|        |                       | pristine WS <sub>DOM</sub> | 2.543 ± 0.178 | 0.010 ± 0.001 | 0.386 ± 0.037 | 0.004 ± 0.001 | 0.901 ± 0.019 | 29.0 ± 1.4 |
|        |                       | pristine SM <sub>DOM</sub> | 0.764 ± 0.059 | 0.052 ± 0.020 | 0.262 ± 0.004 | 0.070 ± 0.032 | 0.983 ± 0.002 | 76.7 ± 1.6 |
|        | 0.2% GT-338 μm Quartz | pristine BC <sub>DOM</sub> | 0.363 ± 0.012 | 0.024 ± 0.004 | 0.000 ± 0.000 | 0.065 ± 0.009 | 0.965 ± 0.009 | 84.8 ± 0.2 |
|        |                       | pristine WS <sub>DOM</sub> | 0.331 ± 0.007 | 0.016 ± 0.003 | 0.002 ± 0.002 | 0.049 ± 0.008 | 0.976 ± 0.003 | 78.8 ± 0.1 |
|        |                       | pristine SM <sub>DOM</sub> | 0.802 ± 0.327 | 0.430 ± 0.420 | 0.043 ± 0.019 | 0.388 ± 0.365 | 0.981 ± 0.009 | 88.2 ± 0.0 |

## S16. Stability of DOM and its influence on the stability of nanoplastics

Settling experiments of individual NPs and pristine DOM and NPs-DOM (with different DOM concentrations) at pH 6.0 were studied. In settling experiments, The influent concentrations of the 50NPs and 400MPs were maintained at  $100 \text{ mg L}^{-1}$ . Each suspension was immediately transferred into cuvettes for the measurement of absorbance at 300 nm over a period of 24 h. All settling experiments were conducted in duplicate. The settling curves were then plotted, whereby the ordinate was the ratio of the absorbance values at a given point in time ( $A$ ) to the initial absorbance ( $A_0$ ) and the abscissa was time.

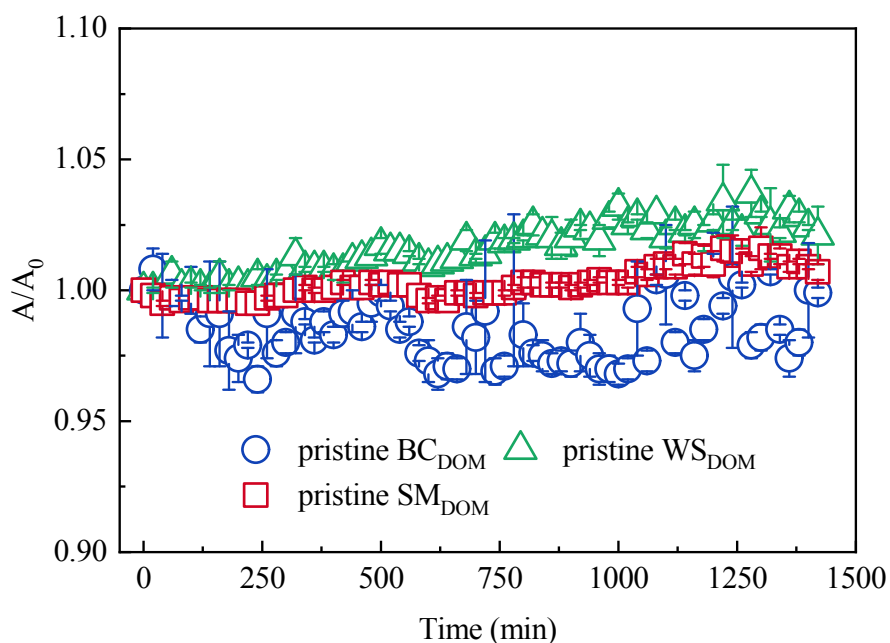

Figure S7. The settling curve of different DOM.

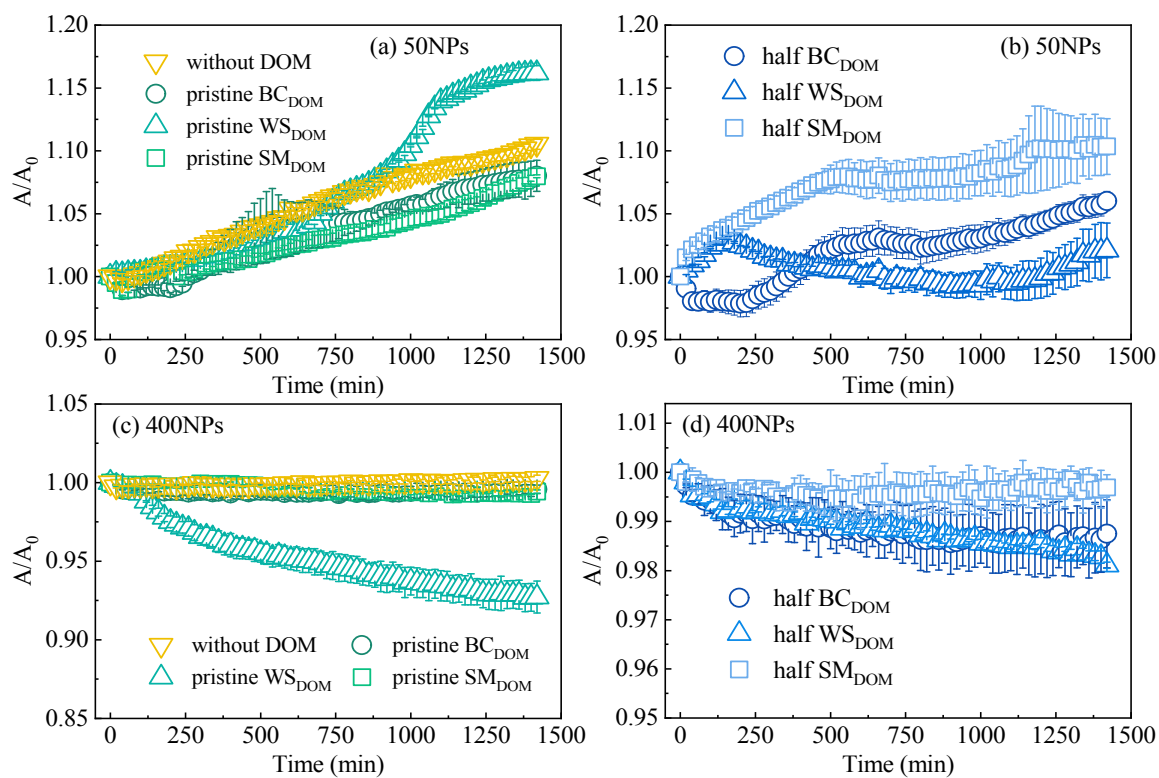

Figure S8. The settling curve of NPs with and without different DOM.

## S17. DLVO interaction energy between nanoplastics and GT-coated sand before and after co-transport with DOM

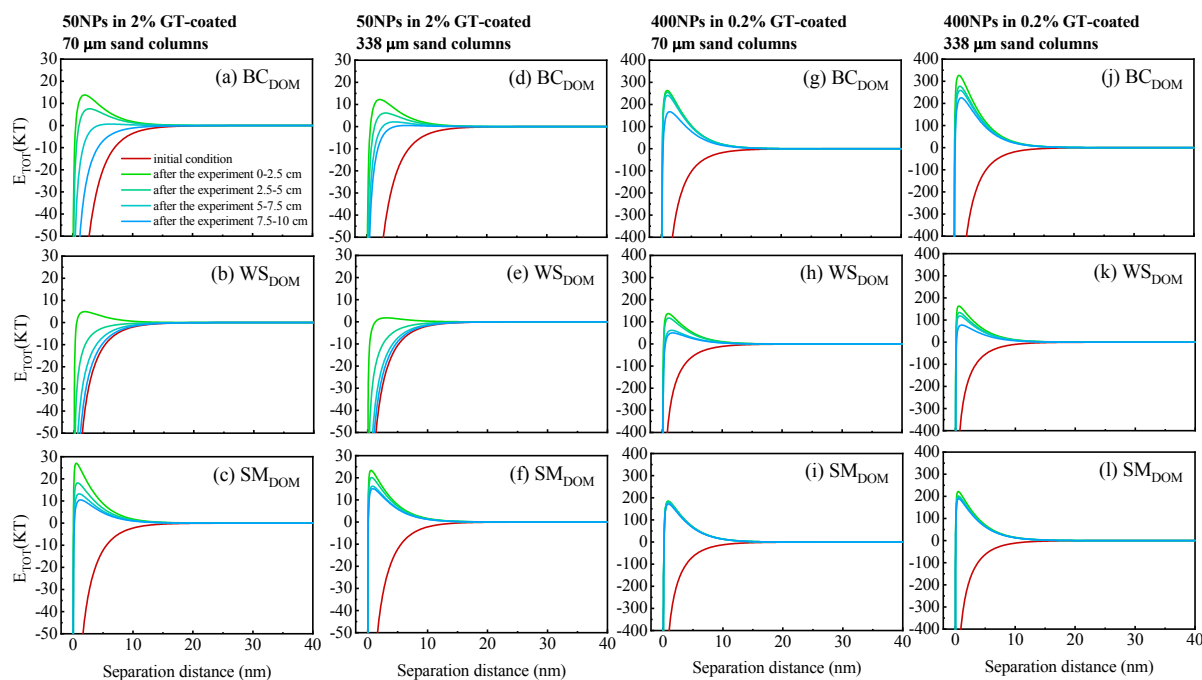

Figure S9. DLVO interaction energy between NPs and sand before (red lines) and after (others) co-transport experiments of NPs and pristine DOM. The  $E_{TOT}$  after co-transport experiment were calculated based on four segmented columns (0-2.5, 2.5-5, 5-7.5, and 7.5-10 cm).

## S18. Deposition of nanoplastics

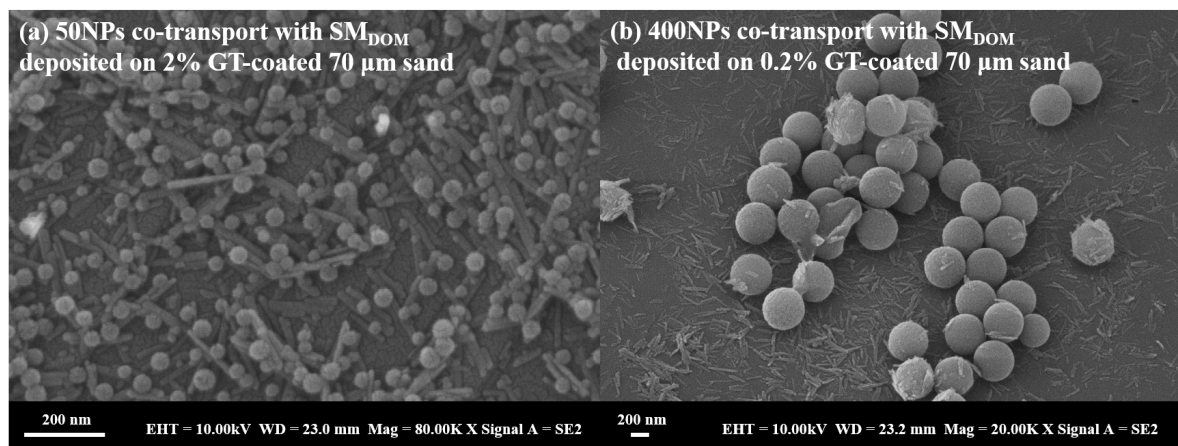

Figure S10. SEM images of NPs deposited on GT coated sand.

## S19. XPS results of nanoplastics and different DOM co-deposited on GT coated sand

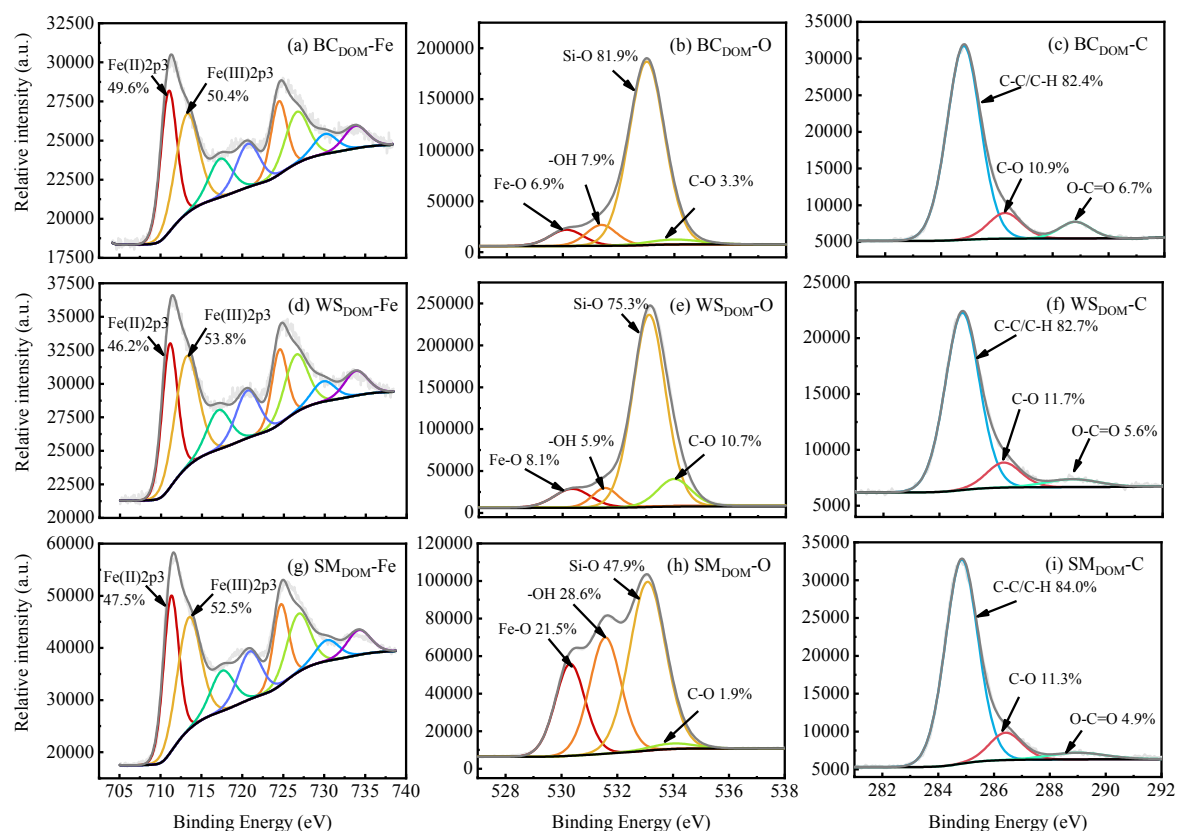

Figure S11. X-ray photoelectron spectroscopy of 50NPs co-transport with different DOM deposited on GT-coated sand. Data was identified by X-ray photoelectron spectroscopy with an Al K $\alpha$  X-ray source (1486.6 eV). Survey spectra were recorded from 1200 ~ 0 eV for each sample in a vacuum of  $8 \times 10^{-10}$  Pa. All peaks were calibrated using the C1s peak at 284.8 eV. The data was processed using the XPSPEAK 4.1.



## S20. Result parameters of quantum chemical computation

Table S8 Area vertex coordinates and mutual penetration distance.

| System | Position | Vertex Coordinate 1 |        |        | Vertex Coordinate 2 |        |        | Mutual penetration distance (Å) |
|--------|----------|---------------------|--------|--------|---------------------|--------|--------|---------------------------------|
|        |          | x                   | y      | z      | x                   | y      | z      |                                 |
| NPs-CL | A        | 5.72                | -0.42  | -3.51  | 6.18                | -1.18  | -2.94  | 1.050                           |
|        | B        | -3.69               | -0.13  | -0.78  | -3.41               | -1.06  | -0.03  | 1.226                           |
|        | C        | -5.17               | -1.35  | -2.23  | -4.92               | -2.27  | -1.64  | 1.128                           |
| NPs-AM | A        | 5.40                | -2.81  | 2.38   | 5.40                | -2.18  | 2.36   | 0.635                           |
|        | B        | 1.68                | -0.75  | 3.98   | 1.72                | 0.06   | 4.17   | 0.831                           |
|        | C        | -4.34               | -4.01  | 3.75   | -3.31               | -3.62  | 4.34   | 1.249                           |
| NPs-OA | A        | 3.13                | 0.99   | -3.50  | 2.92                | 0.79   | -3.70  | 0.359                           |
|        | B        | 1.94                | 1.26   | -1.58  | 1.83                | 1.23   | -1.74  | 0.201                           |
|        | C        | 0.92                | 1.83   | -2.93  | 0.94                | 1.68   | -3.01  | 0.168                           |
| NPs-TP | A        | 2.67                | 1.10   | -3.29  | 1.75                | 1.43   | -2.76  | 1.119                           |
|        | B        | 0.15                | -2.63  | -4.23  | 0.07                | -2.39  | -4.23  | 0.252                           |
|        | C        | -3.92               | -2.25  | -3.92  | -3.49               | -2.45  | -3.02  | 1.010                           |
| NPs-HA | A        | 6.026               | 3.116  | 0.908  | 5.947               | 3.355  | -0.123 | 1.061                           |
|        | B        | 4.069               | 3.773  | 3.078  | 4.61                | 2.943  | 3.586  | 1.113                           |
|        | C        | 1.397               | 3.62   | 3.329  | 1.109               | 2.664  | 3.119  | 1.020                           |
| NPs-FA | A        | -4.418              | 3.576  | -2.299 | -5.249              | 3.718  | -2.993 | 1.092                           |
|        | B        | -1.521              | -2.085 | -3.685 | -2.034              | -3.068 | -4.184 | 1.216                           |
|        | C        | -0.843              | -3.903 | -3.590 | -1.356              | -4.375 | -3.983 | 0.800                           |

Table S9 Binding energy between representative DOM and NPs.

| System  | Binding energy (kJ mol <sup>-1</sup> ) | Binding energy (Hartree) | E <sub>complex</sub> (Hartree) | E <sub>fragment1</sub> (Hartree) | E <sub>fragment2</sub> (Hartree) |
|---------|----------------------------------------|--------------------------|--------------------------------|----------------------------------|----------------------------------|
| NPs-CL  | -178.29                                | -0.0679                  | -3685.317                      | -1240.301                        | -2444.948                        |
| NPs-AM- | -158.609                               | -0.0604                  | -3748.058                      | -1240.290                        | -2507.707                        |
| NPs-OA  | -117.76                                | -0.0449                  | -2096.255                      | -1240.302                        | -855.908                         |
| NPs-TP  | -121.81                                | -0.0464                  | -2420.979                      | -1240.299                        | -1180.634                        |
| NPs-HA  | -169.92                                | -0.0647                  | -7059.133                      | -1240.305                        | -5818.764                        |
| NPs-FA  | -166.08                                | -0.0633                  | -3639.782                      | -1240.302                        | -2399.417                        |

## References

1. Chen, W.; Westerhoff, P.; Leenheer, J. A.; Booksh, K., Fluorescence excitation-emission matrix regional integration to quantify spectra for dissolved organic matter. *Environmental Science & Technology* **2003**, *37*, (24), 5701-10.
2. Zsolnay, A.; Baigar, E.; Jimenez, M.; Steinweg, B.; Saccomandi, F., Differentiating with fluorescence spectroscopy the sources of dissolved organic matter in soils subjected to drying. *Chemosphere* **1999**, *38*, (1), 45-50.
3. Yu, B.; Jia, S. Y.; Liu, Y.; Wu, S. H.; Han, X., Mobilization and re-adsorption of arsenate on ferrihydrite and hematite in the presence of oxalate. *Journal of Hazardous Materials* **2013**, *262*, (22), 701-708.
4. Bradford, S. A.; Jirka, S.; Mehdi, B.; Martinus Th, V. G.; Yates, S. R., Modeling colloid attachment, straining, and exclusion in saturated porous media. *Environmental Science & Technology* **2003**, *37*, (10), 2242-50.
5. Derjaguin, B.; Landau, L., Theory of the stability of strongly charged lyophobic sols and of the adhesion of strongly charged particles in solutions of electrolytes. *Acta Physicochim USSR. Band* **1941**, *S*, 30-59.
6. Verwey, E. J. W.; Overbeek, J. T. G., Theory of the stability of lyophobic colloids. *Elsevier, New York* **1948**, OCLC 2313484.
7. Masliyeh, J., Particle deposition and aggregation: measurement, modelling and simulation. *Journal of Colloid and Interface Science* **1998**, *200*, (1), 363.
8. Gregory, J., Approximate expressions for retarded van der waals interaction. *Journal of Colloid & Interface Science* **1981**, *83*, (1), 138-145.
9. Israelachvili, J. N., *Intermolecular and surface forces*. Academic Press, Cambridge, London, 3rd Edition. 2011; Vol. 2, p 59–65.
10. Bergström, L., Hamaker constants of inorganic materials. *Advances in Colloid & Interface Science* **1997**, *70*, (1), 125-169.
11. Hogg, R.; Healy, T. W.; Fuerstenau, D. W., Mutual coagulation of colloidal dispersions. *Transactions of the Faraday Society* **1966**, *62*.
12. Walters, J. K., *Particle deposition and aggregation, measurement, modelling and*

*simulation. Butterworth-Heinemann, University College, London , 1st Edition. 1996;*  
Vol. 64, p 363.

13. Frisch, M. J.; Trucks, G. W.; Schlegel, H. B.; Scuseria, G. E.; Robb, M. A.; Cheeseman, J. R.; Scalmani, G.; Barone, V.; Petersson, G. A.; Nakatsuji, H.; Li, X.; Caricato, M.; Marenich, A. V.; Bloino, J.; Janesko, B. G.; Gomperts, R.; Mennucci, B.; Hratchian, H. P.; Ortiz, J. V.; Izmaylov, A. F.; Sonnenberg, J. L.; Williams-Young, D.; Ding, F.; Lipparini, F.; Egidi, F.; Goings, J.; Peng, B.; Petrone, A.; Henderson, T.; Ranasinghe, D.; Zakrzewski, V. G.; Gao, J.; Rega, N.; Zheng, G.; Liang, W.; Hada, M.; Ehara, M.; Toyota, K.; Fukuda, R.; Hasegawa, J.; Ishida, M.; Nakajima, T.; Honda, Y.; Kitao, O.; Nakai, H.; Vreven, T.; Throssell, K.; Jr. Montgomery, J. A.; Peralta, J. E.; Ogliaro, F.; Bearpark, M. J.; Heyd, J. J.; Brothers, E. N.; Kudin, K. N.; Staroverov, V. N.; A., K. T.; Kobayashi, R.; Normand, J.; Raghavachari, K.; Rendell, A. P.; Burant, J. C.; Iyengar, S. S.; Tomasi, J.; Cossi, M.; Millam, J. M.; Klene, M.; Adamo, C.; Cammi, R.; Ochterski, J. W.; Martin, R. L.; Morokuma, K.; Farkas, O.; Foresman, J. B.; Fox, D. J. *Gaussian 16, Revision B.01*, Gaussian, Inc., Wallingford CT, 2016.

14. Ouni, Y.; Ghnaya, T.; Montemurro, F.; Abdelly, C.; Lakhdar, A., The role of humic substances in mitigating the harmful effects of soil salinity and improve plant productivity. *International Journal of Plant Production* **2014**, *8(3)*, 353-374.

15. Brunt, K.; Sanders, P.; Rozema, T., The Enzymatic Determination of Starch in Food, Feed and Raw Materials of the Starch Industry. *Starch - Stärke* **1998**, *50*, (10), 413-419.

16. Mongeau, R.; Brassard, R., Determination of Neutral Detergent Fiber in Breakfast Cereals: Pentose, Hemicellulose, Cellulose and Lignin Content. *Journal of Food Science* **1982**, *47*, (2), 550-555.

17. Safiur Rahman, M.; Whalen, M.; Gagnon, G. A., Adsorption of dissolved organic matter (DOM) onto the synthetic iron pipe corrosion scales (goethite and magnetite): Effect of pH. *Chemical Engineering Journal* **2013**, *234*, 149-157.

18. Bai, L.; Cao, C.; Wang, C.; Wang, C.; Zhang, H.; Jiang, H., Roles of phytoplankton- and macrophyte-derived dissolved organic matter in sulfamethazine adsorption on goethite. *Environmental pollution* **2017**, *230*, 87-95.
